# Supplementary material
Source: HighWire-hosted journal article supplement (https://care.diabetesjournals.org/content/suppl/2009/10/14/dc09-1459)
Supplement: dc09-1459_Online_Appendix.pdf [file dc09-1459_Online_Appendix.pdf]

## HELENA Study Group (Healthy Lifestyle in Europe by Nutrition in Adolescence)

**Co-ordinator:** Luis A Moreno

**Core Group members:** Luis A Moreno, Frédéric Gottrand, Stefaan De Henauw, Marcela González-Gross and Chantal Gilbert.

**Steering Committee:** Anthony Kafatos (President), Luis A Moreno, Christian Libersa, Stefaan De Henauw, Jackie Sánchez, Frédéric Gottrand, Mathilde Kersting, Michael Sjöström, Dénes Molnér, Marcela González-Gross, Jean Dallongeville, Chantal Gilbert, Gunnar Hall, Lea Maes and Luca Scalfi.

**Project Manager:** Pilar Meléndez.

**1. Universidad de Zaragoza (Spain):** Luis A Moreno, Jesús Fleta, José A Casajús, Gerardo Rodríguez, Concepción Tomás, María I Mesana, Germán Vicente-Rodríguez, Adoración Villarroya, Carlos M Gil, Ignacio Ara, Juan Revenga, Carmen Lachen, Juan Fernández Alvira, Gloria Bueno, Aurora Lázaro, Olga Bueno, Juan F León, Jesús M<sup>a</sup> Garagorri, Manuel Bueno, Juan Pablo Rey López, Iris Iglesia, Paula Velasco and Silvia Bel.

**2. Consejo Superior de Investigaciones Científicas (Spain):** Ascensión Marcos, Julia Wärnberg, Esther Nova, Sonia Gómez, Esperanza Ligia Díaz, Javier Romeo, Ana Veses, Mari Angeles Puertollano, Belén Zapatera and Tamara Pozo.

**3. Université de Lille 2 (France):** Laurent Beghin, Christian Libersa, Frédéric Gottrand, Catalina Iliescu and Juliana Von Berlepsch.

**4. Research Institute of Child Nutrition Dortmund, Rheinische Friedrich-Wilhelms-Universität Bonn (Germany):** Mathilde Kersting, Wolfgang Sichert-Hellert and Ellen Koeppen.

**5. Pécsi Tudományegyetem (University of Pécs) (Hungary):** Dénes Molnar, Eva Erhardt, Katalin Csernus, Katalin Török, Szilvia Bokor, Mrs Angster, Enikő Nagy, Orsolya Kovács and Judit Répasi.

**6. University of Crete, School of Medicine (Greece):** Anthony Kafatos, Caroline Codrington, María Plada, Angeliki Papadaki, Katerina Sarri, Anna Viskadourou, Christos Hatzis, Michael Kiriakakis, George Tsibinos, Constantine Vardavas Manolis Sbokos, Eva Protoyarakis and Maria Fasoulaki.

**7. Institut für Ernährungs und Lebensmittelwissenschaften—Ernährungsphysiologie. Rheinische Friedrich Wilhelms Universität (Germany):** Peter Stehle, Klaus Pietrzik, Marcela González-Gross, Christina Breidenassel, Andre Spinneker, Jasmin Al-Tahan, Miriam Segoviano, Anke Berchtold, Christine Bierschbach, Erika Blatzheim, Adelheid Schuch and Petra Pickert.

**8. University of Granada (Spain):** Manuel J Castillo Garzón, Ángel Gutiérrez Sáinz, Francisco B Ortega Porcel, Jonatan Ruiz Ruiz, Enrique García Artero, Vanesa España Romero, David Jiménez Pavón, Cristóbal Sánchez Muñoz, Víctor Soto, Palma Chillón, José M Heredia, Virginia Aparicio, Pedro Baena, Claudia M Cardia and Ana Carbonell.

**9. Istituto Nazionale di Ricerca per gli Alimenti e la Nutrizione (Italy):** Davide Arcella, Giovina Catasta, Laura Censi, Donatella Ciarapica, Marika Ferrari, Cinzia Le Donne, Catherine Leclercq, Luciana Magri, Giuseppe Maiani, Rafaela Piccinelli, Angela Polito, Raffaella Spada and Elisabetta Toti.

- 10. University of Napoli 'Federico II' Department of Food Science (Italy):** Luca Scalfi, Paola Vitaglione and Concetta Montagnese.
- 11. Ghent University (Belgium):** Ilse De Bourdeaudhuij, Stefaan De Henauw, Tineke De Vriendt, Lea Maes, Christophe Matthys, Carine Vereecken, Mieke de Maeyer and Charlene Ottevaere.
- 12. Medical University of Vienna (Austria):** Kurt Widhalm, Katharina Phillip, Sabine Dietrich, Birgit Kubelka and Marion Boriss-Riedl.
- 13. Harokopio University (Greece):** Yannis Manios, Eva Grammatikaki, Zoi Bouloubasi, Tina Louisa Cook, Sofia Eleutheriou, Orsalia Consta, George Moschonis, Ioanna Katsaroli, George Kraniou, Stalo Papoutsou, Despoina Keke, Ioanna Petraki, Elena Bellou, Sofia Tanagra, Kostalenia Kallianoti, Dionysia Argyropoulou, Katerina Kondaki, Stamatoula Tsikrika and Christos Karaiskos.
- 14. Institut Pasteur de Lille (France):** Jean Dallongeville and Aline Meirhaeghe.
- 15. Karolinska Institutet (Sweden):** Michael Sjöström, Patrick Bergman, María Hagströmer, Lena Hallström, Marten Hallberg, Eric Poortvliet, Julia Wärnberg, Nico Rizzo, Linda Beckman, Anita Hurtig Wennlöf, Emma Patterson, Lydia Kwak, Lars Cernerud, Per Tillgren and Stefaan Sörensen.
- 16. Asociación de Investigación de la Industria Agroalimentaria (Spain):** Jackie Sánchez-Molero, Elena Picó, Maite Navarro, Blanca Viadel, José Enrique Carreres, Gema Merino, Rosa Sanjuán, María Lorente, María José Sánchez and Sara Castelló.
- 17. Campden and Chorleywood Food Research Association (UK):** Chantal Gilbert, Sarah Thomas, Peter Burgess.
- 18. SIKFInstitutet foer Livsmedel och Bioteknik (Sweden):** Gunnar Hall, Annika Astrom, Anna Sverkén and Agneta Broberg.
- 19. Meurice Recherche and Development asbl (Belgium):** Annick Masson, Claire Lehoux, Pascal Brabant, Philippe Pate and Laurence Fontaine.
- 20. Campden and Chorleywood Food Development Institute (Hungary):** Andras Sebok, Tunde Kuti and Adrienn Hegyi.
- 21. Productos Aditivos SA (Spain):** Cristina Maldonado and Ana Llorente.
- 22. Cárnicas Serrano SL (Spain):** Emilio García.
- 23. Cederroth International AB (Sweden):** Holger von Fircks, Marianne Lilja Hallberg and Maria Messerer.
- 24. Lantmännen Food R&D (Sweden):** Mats Larsson, Helena Fredriksson, Viola Adamsson and Ingmar Börjesson.
- 25. European Food Information Council (Belgium):** Laura Fernández, Laura Smillie and Josephine Wills.
- 26. Universidad Politécnica de Madrid (Spain):** Marcela González-Gross, Agustín Meléndez, Pedro J Benito, Javier Calderón, David Jiménez-Pavón, Jara Valtueña, Paloma Navarro, Alejandro Urzanqui, Ulrike Albers, Raquel Pedrero and Juan José Gómez Lorente.
